# Supplementary material
Source: PubMed Central journal article supplement (PMC7825275)
Supplement: NIHMS1540512-supplement-280_2019_3960_MOESM1_ESM.pdf [file NIHMS1540512-supplement-280_2019_3960_MOESM1_ESM.pdf]

**Supplemental Table 1. Toxicity by Grade; Cycle 1-Carboplatin and Paclitaxel (n=46).**

| Event                         | Any Grade              | Grade 1 | Grade 2 | Grade 3 | Grade 4 |
|-------------------------------|------------------------|---------|---------|---------|---------|
|                               | number of patient (%)* |         |         |         |         |
| Any adverse event             | 40 (87)                | 31 (67) | 27 (59) | 18 (39) | 12 (26) |
| Neutrophil count decreased    | 26 (56)                | 0       | 6 (13)  | 9 (20)  | 11 (24) |
| White blood cell decreased    | 21 (46)                | 4 (9)   | 6 (13)  | 8 (17)  | 3 (6)   |
| Nausea                        | 13 (28)                | 11 (24) | 1 (2)   | 1 (2)   | 0       |
| Alopecia                      | 12 (26)                | 12 (26) | 0       | 0       | 0       |
| Fatigue                       | 11 (24)                | 8 (17)  | 3 (6)   | 0       | 0       |
| Anemia                        | 10 (22)                | 1 (2)   | 8 (17)  | 0       | 1 (2)   |
| Vomiting                      | 7 (15)                 | 4 (9)   | 2 (4)   | 1 (2)   | 0       |
| Diarrhea                      | 7 (15)                 | 5 (11)  | 2 (4)   | 0       | 0       |
| Peripheral sensory neuropathy | 6 (13)                 | 6 (13)  | 0       | 0       | 0       |
| Platelet count decreased      | 5 (11)                 | 1 (2)   | 3 (6)   | 0       | 1 (2)   |
| Pain in extremity             | 4 (9)                  | 1 (2)   | 3 (6)   | 0       | 0       |
| Myalgia                       | 4 (9)                  | 2 (4)   | 2 (4)   | 0       | 0       |
| Dyspepsia                     | 4 (9)                  | 3 (6)   | 1 (2)   | 0       | 0       |
| Insomnia                      | 3 (6)                  | 2 (4)   | 1 (2)   | 0       | 0       |
| Hyponatremia                  | 2 (4)                  | 1 (2)   | 0       | 1 (2)   | 0       |
| Hypocalcemia                  | 2 (4)                  | 0       | 2 (4)   | 0       | 0       |
| Lymphocyte count decreased    | 2 (4)                  | 0       | 2 (4)   | 0       | 0       |

|                                            |       |       |       |       |   |
|--------------------------------------------|-------|-------|-------|-------|---|
| Arthralgia                                 | 2 (4) | 1 (2) | 1 (2) | 0     | 0 |
| Dyspnea                                    | 2 (4) | 2 (4) | 0     | 0     | 0 |
| Mucositis, oropharyngeal                   | 2(4)  | 2 (4) | 0     | 0     | 0 |
| Constipation                               | 2 (4) | 3 (6) | 0     | 0     | 0 |
| Muscle weakness                            | 2 (4) | 1(2)  | 1 (2) | 0     | 0 |
| Thromboembolic event                       | 1 (2) | 0     | 0     | 1 (2) | 0 |
| Dehydration                                | 1 (2) | 0     | 1 (2) | 0     | 0 |
| Rash maculopapular                         | 1 (2) | 0     | 1 (2) | 0     | 0 |
| Anorexia                                   | 1 (2) | 0     | 1 (2) | 0     | 0 |
| Flu like symptoms                          | 1 (2) | 1 (2) | 0     | 0     | 0 |
| Hiccups                                    | 1 (2) | 1 (2) | 0     | 0     | 0 |
| Tremor                                     | 1 (2) | 1 (2) | 0     | 0     | 0 |
| Alkaline phosphatase increased             | 1 (2) | 1 (2) | 0     | 0     | 0 |
| Dysgeusia                                  | 1 (2) | 1 (2) | 0     | 0     | 0 |
| Hypercalcemia                              | 1 (2) | 1 (2) | 0     | 0     | 0 |
| Hypophosphatemia                           | 1 (2) | 1 (2) | 0     | 0     | 0 |
| Palmar-plantar erythrodysesthesia syndrome | 1 (2) | 1 (2) | 0     | 0     | 0 |
| Fever                                      | 1 (2) | 1 (2) | 0     | 0     | 0 |
| Gingival pain                              | 1 (2) | 1 (2) | 0     | 0     | 0 |
| Bone pain                                  | 1 (2) | 1 (2) | 0     | 0     | 0 |

**Supplemental Table 2. Toxicity by Grade, All Cycles (n=73).**

| <b>Event</b>                  | <b>Any Grade</b>              | <b>Grade 1</b> | <b>Grade 2</b> | <b>Grade 3</b> | <b>Grade 4</b> |
|-------------------------------|-------------------------------|----------------|----------------|----------------|----------------|
|                               | <b>number of patients (%)</b> |                |                |                |                |
| Any adverse event             | 72 (99)                       | 65 (89)        | 63 (86)        | 50 (68)        | 46 (63)        |
| Neutrophil count decreased    | 60 ( 82)                      | 2 (3)          | 3 (4)          | 13 (18)        | 42 (57)        |
| White blood cell decreased    | 52 (71)                       | 4 (5)          | 16 (22)        | 22 (30)        | 10 (14)        |
| Fatigue                       | 46 (63)                       | 25 (34)        | 16 (22)        | 5 (7)          | 0              |
| Anemia                        | 43 (59)                       | 3 (4)          | 25 (34)        | 14 (19)        | 1 (1)          |
| Nausea                        | 41 (56)                       | 28 (38)        | 9 (12)         | 4 (5)          | 0              |
| Platelet count decreased      | 36 (49)                       | 8 (11)         | 17 (23)        | 8 (11)         | 3 (4)          |
| Peripheral sensory neuropathy | 30 (41)                       | 22 (30)        | 5 (7)          | 3 (4)          | 0              |
| Alopecia                      | 26 (36)                       | 13 (18)        | 13 (18)        | 0              | 0              |
| Vomiting                      | 21 (29)                       | 12 (16)        | 7 (10)         | 2 (3)          | 0              |
| Diarrhea                      | 19 (26)                       | 15 (21)        | 4 (5)          | 0              | 0              |
| Lymphocyte count decreased    | 15 (21)                       | 2 (3)          | 8 (11)         | 4 (5)          | 1 (1)          |
| Anorexia                      | 15 (21)                       | 12 (16)        | 3 (4)          | 0              | 0              |
| Myalgia                       | 14 (19)                       | 10 (14)        | 4 (5)          | 0              | 0              |
| Constipation                  | 13 (18)                       | 10 (14)        | 3 (4)          | 0              | 0              |
| Arthralgia                    | 10 (14)                       | 8 (11)         | 2 (3)          | 0              | 0              |
| Hyponatremia                  | 9 (12)                        | 6 (8)          | 0              | 2 (3)          | 1 (1)          |
| Muscle weakness               | 8 (11)                        | 5 (7)          | 2 (3)          | 1 (1)          | 0              |
| Dyspepsia                     | 8 (11)                        | 6 (8)          | 2 (3)          | 0              | 0              |
| Fever                         | 8 (11)                        | 5 (7)          | 1 (1)          | 2 (3)          | 0              |
| Hypocalcemia                  | 7 (10)                        | 2 (3)          | 3 (4)          | 2 (3)          | 0              |
| Dyspnea                       | 7 (10)                        | 6 (8)          | 1 (1)          | 0              | 0              |

|                                      |        |        |       |       |       |
|--------------------------------------|--------|--------|-------|-------|-------|
| Alkaline phosphatase increased       | 7 (10) | 6 (8)  | 1 (1) | 0     | 0     |
| Mucositis, oropharangeal             | 7 (10) | 7 (10) | 0     | 0     | 0     |
| Dysgeusia                            | 7 (10) | 7 (10) | 0     | 0     | 0     |
| Pain in extremity                    | 6 (8)  | 2 (3)  | 3 (4) | 1 (1) | 0     |
| Hypomagnesemia                       | 6 (8)  | 4 (5)  | 2 (3) | 0     | 0     |
| Creatinine increased                 | 6 (8)  | 5 (7)  | 1 (1) | 0     | 0     |
| Aspartate aminotransferase increased | 6 (8)  | 5 (7)  | 1 (1) | 0     | 0     |
| Cough                                | 6 (8)  | 6 (8)  | 0     | 0     | 0     |
| Weight loss                          | 5 (7)  | 2 (3)  | 2 (3) | 1 (1) | 0     |
| Dizziness                            | 5 (7)  | 4 (5)  | 0     | 1 (1) | 0     |
| Insomnia                             | 5 (7)  | 4 (5)  | 1 (1) | 0     | 0     |
| Thromboembolic event                 | 4 (5)  | 0      | 1 (1) | 2 (3) | 1 (1) |
| Allergic reaction                    | 4 (5)  | 3 (4)  | 0     | 0     | 1 (1) |
| Hypokalemia                          | 4 (5)  | 2 (3)  | 0     | 2 (3) | 0     |
| Hypoalbuminemia                      | 4 (5)  | 2 (3)  | 2 (3) | 0     | 0     |
| Edema limbs                          | 4 (5)  | 2 (3)  | 2 (3) | 0     | 0     |
| Rash, maculopapular                  | 4 (5)  | 3 (4)  | 1 (1) | 0     | 0     |
| Headache                             | 4 (5)  | 3 (4)  | 1 (1) | 0     | 0     |
| Alanine aminotransferase increased   | 4 (5)  | 4 (5)  | 0     | 0     | 0     |
| Febrile neutropenia                  | 3 (4)  | 0      | 0     | 1 (1) | 2 (3) |
| Hypophosphatemia                     | 3 (4)  | 1 (1)  | 0     | 2 (3) | 0     |
| Dehydration                          | 3 (4)  | 0      | 2 (3) | 1 (1) | 0     |
| Pruritus                             | 3 (4)  | 3 (4)  | 0     | 0     | 0     |
| Bone pain                            | 3 (4)  | 3 (4)  | 0     | 0     | 0     |

|                             |       |       |       |       |       |
|-----------------------------|-------|-------|-------|-------|-------|
| Sepsis                      | 2 (3) | 0     | 0     | 0     | 2 (3) |
| Dysphagia                   | 2 (3) | 1 (1) | 0     | 1 (1) | 0     |
| Blood bilirubin increased   | 2 (3) | 1 (1) | 1 (1) | 0     | 0     |
| Pain                        | 2 (3) | 1 (1) | 1 (1) | 0     | 0     |
| Flushing                    | 2 (3) | 2 (3) | 0     | 0     | 0     |
| Flu-Like symptoms           | 2 (3) | 2 (3) | 0     | 0     | 0     |
| Hiccups                     | 2 (3) | 2 (3) | 0     | 0     | 0     |
| Anxiety                     | 2 (3) | 2 (3) | 0     | 0     | 0     |
| Abdominal pain              | 2 (3) | 2 (3) | 0     | 0     | 0     |
| Chills                      | 2 (3) | 2 (3) | 0     | 0     | 0     |
| Dry mouth                   | 2 (3) | 2 (3) | 0     | 0     | 0     |
| Gastritis                   | 2 (3) | 2 (3) | 0     | 0     | 0     |
| Rash acneiform              | 2 (3) | 2 (3) | 0     | 0     | 0     |
| Pulmonary Embolism          | 1 (1) | 0     | 0     | 1 (1) | 0     |
| Atrial fibrillation         | 1 (1) | 0     | 0     | 1 (1) | 0     |
| Presyncope                  | 1 (1) | 0     | 0     | 1 (1) | 0     |
| Enterocolitis infectious    | 1 (1) | 0     | 0     | 1 (1) | 0     |
| Syncope                     | 1 (1) | 0     | 0     | 1 (1) | 0     |
| Cytokine release syndrome   | 1 (1) | 0     | 1 (1) | 0     | 0     |
| Back pain                   | 1 (1) | 0     | 1 (1) | 0     | 0     |
| Lung infection              | 1 (1) | 0     | 1 (1) | 0     | 0     |
| Hematuria                   | 1 (1) | 0     | 1 (1) | 0     | 0     |
| Hypercalcemia               | 1 (1) | 0     | 1 (1) | 0     | 0     |
| Erythema multiforme         | 1 (1) | 0     | 1 (1) | 0     | 0     |
| Upper respiratory infection | 1 (1) | 0     | 1 (1) | 0     | 0     |

|                                            |       |       |       |   |   |
|--------------------------------------------|-------|-------|-------|---|---|
| Laryngitis                                 | 1 (1) | 0     | 1 (1) | 0 | 0 |
| Hypertension                               | 1 (1) | 0     | 1 (1) | 0 | 0 |
| Acute kidney injury                        | 1 (1) | 0     | 1 (1) | 0 | 0 |
| Blurred vision                             | 1 (1) | 1 (1) | 0     | 0 | 0 |
| Injection site reaction                    | 1 (1) | 1 (1) | 0     | 0 | 0 |
| Tremor                                     | 1 (1) | 1 (1) | 0     | 0 | 0 |
| Palmar-plantar erythrodysesthesia syndrome | 1 (1) | 1 (1) | 0     | 0 | 0 |
| Bronchospasm                               | 1 (1) | 1 (1) | 0     | 0 | 0 |
| Esophagitis                                | 1 (1) | 1 (1) | 0     | 0 | 0 |
| Gingival pain                              | 1 (1) | 1 (1) | 0     | 0 | 0 |
| Hyperhidrosis                              | 1 (1) | 1 (1) | 0     | 0 | 0 |
| Urinary incontinence                       | 1 (1) | 1 (1) | 0     | 0 | 0 |
| Sinus disorder                             | 1 (1) | 1 (1) | 0     | 0 | 0 |
| Flatulence                                 | 1 (1) | 1 (1) | 0     | 0 | 0 |
| Stomach pain                               | 1 (1) | 1 (1) | 0     | 0 | 0 |
| Ataxia                                     | 1 (1) | 1 (1) | 0     | 0 | 0 |
| Dry skin                                   | 1 (1) | 1 (1) | 0     | 0 | 0 |
| Generalized muscle weakness                | 1 (1) | 1 (1) | 0     | 0 | 0 |
| Purpura                                    | 1 (1) | 1 (1) | 0     | 0 | 0 |
| Skin ulceration                            | 1 (1) | 1 (1) | 0     | 0 | 0 |
| Dysesthesia                                | 1 (1) | 1 (1) | 0     | 0 | 0 |
| Depression                                 | 1 (1) | 1 (1) | 0     | 0 | 0 |
| Paresthesia                                | 1 (1) | 1 (1) | 0     | 0 | 0 |
| Facial nerve disorder                      | 1 (1) | 1 (1) | 0     | 0 | 0 |

**Supplemental Table 3. Mean (standard deviation) pharmacokinetic parameters of veliparib alone, first dose (day 1) and veliparib at steady-state in the presence of carboplatin and paclitaxel (CT, day 3).**

|                    | D1, CT -                    |                         |                                   |                         |               | D3, CT +                    |                                  | Ratio <sub>D3/D1</sub> |                    |
|--------------------|-----------------------------|-------------------------|-----------------------------------|-------------------------|---------------|-----------------------------|----------------------------------|------------------------|--------------------|
| Dose<br>(mg) (N/N) | C <sub>max</sub><br>(ng/mL) | T <sub>max</sub><br>(h) | AUC <sub>0-inf</sub><br>(µg•h/mL) | T <sub>1/2</sub><br>(h) | CL/F<br>(L/h) | C <sub>max</sub><br>(ng/mL) | AUC <sub>0-12</sub><br>(µg•h/mL) | C <sub>max</sub>       | AUC <sub>0-8</sub> |
| 10 (1/1)           | 45                          | 3.0                     | 0.42                              | 5.6                     | 23.7          | 66                          | 0.50                             | 1.47                   | 1.46               |
| 20 (10/11)         | 124 (43)                    | 1.6 (1.1)               | 0.86 (0.27)                       | 6.0 (1.5)               | 25.4 (7.8)    | 126 (46)                    | 0.78 (0.30)                      | 1.08                   | 1.21               |
| 40 (16/15)         | 298 (222)                   | 1.4 (0.8)               | 1.79 (1.28)                       | 4.3 (1.1)               | 28.3 (10.9)   | 240 (77)                    | 1.36 (0.44)                      | 1.02                   | 1.10               |
| 50 (5/5)           | 330 (150)                   | 1.3 (0.3)               | 1.92 (0.51)                       | 5.9 (2.4)               | 27.5 (6.9)    | 272 (55)                    | 1.87 (0.36)                      | 1.05                   | 1.30               |
| 80 (9/11)          | 698 (330)                   | 1.9 (1.1)               | 4.65 (1.73)                       | 5.5 (2.7)               | 19.5 (7.1)    | 581 (186)                   | 3.88 (1.11)                      | 0.73                   | 0.95               |
| 100 (7/8)          | 777 (234)                   | 1.6 (0.8)               | 4.66 (1.58)                       | 4.4 (0.7)               | 23.6 (7.7)    | 612 (241)                   | 4.32 (1.62)                      | 0.86                   | 1.09               |
| 120 (9/10)         | 703 (385)                   | 1.5 (1.1)               | 5.35 (4.58)                       | 5.4 (5.0)               | 40.0 (40.5)   | 763 (367)                   | 4.95 (2.31)                      | 1.00                   | 1.27               |
| All (57/61)        | -                           | 1.6 (0.9)               | -                                 | 5.1 (2.5)               | 27.5 (18.2)   | -                           | -                                | 1.01                   | 1.12               |

N/N, in the absence and presence of carboplatin and paclitaxel.

Day 1 AUC<sub>0-inf</sub> extrapolated beyond the last time point sampled was mean 37% (range 17-87%).

Day 3 AUC<sub>0-12</sub> extrapolated beyond the last time point sampled was mean 24% (range 9-37%).

Ratios reported as median; mean overall ratio C<sub>max</sub> 1.07 (0.82), AUC<sub>0-8</sub> 1.23 (0.72). Median accumulation ratio expected based on individual day 1 half-lives is 1.20; mean 1.26 (0.27).

**Supplemental Table 4. Mean (standard deviation) pharmacokinetic parameters of ultrafilterable carboplatin in the absence and presence of veliparib.**

|                                    | Veliparib -                 |                                     |                         |                | Veliparib +                 |                                     |                | Ratio+/-<br>veliparib |                      |      |
|------------------------------------|-----------------------------|-------------------------------------|-------------------------|----------------|-----------------------------|-------------------------------------|----------------|-----------------------|----------------------|------|
| Veliparib<br>Dose<br>(mg)<br>(N/N) | C <sub>max</sub><br>(µg/mL) | AUC <sub>0-inf</sub><br>(mg•min/mL) | T <sub>1/2</sub><br>(h) | CL<br>(mL/min) | C <sub>max</sub><br>(µg/mL) | AUC <sub>0-inf</sub><br>(mg•min/mL) | CL<br>(mL/min) | C <sub>max</sub>      | AUC <sub>0-inf</sub> | CL   |
| 20 (11/11)                         | 30.9 (9.1)                  | 6.98 (2.10)                         | 3.0 (1.0)               | 113 (40)       | 33.1 (11.7)                 | 7.38 (1.88)                         | 105 (39)       | 1.06                  | 1.02                 | 0.98 |
| 40 (19/15)                         | 31.1 (9.1)                  | 7.49 (1.66)                         | 3.5 (0.9)               | 105 (32)       | 28.1 (8.2)                  | 6.65 (1.60)                         | 125 (61)       | 0.91                  | 0.82                 | 1.12 |
| 50 (5/3)                           | 30.3 (7.3)                  | 7.92 (3.16)                         | 3.5 (1.2)               | 106 (33)       | 36.0 (10.9)                 | 8.48 (3.13)                         | 89.9 (29.8)    | 0.89                  | 1.00                 | 1.01 |
| 80 (7/9)                           | 34.9 (14.4)                 | 8.34 (2.07)                         | 3.1 (0.4)               | 93.7 (38.8)    | 27.9 (8.0)                  | 7.75 (3.29)                         | 90.6 (31.2)    | 0.88                  | 0.82                 | 1.21 |
| 100 (0/8)                          | -                           | -                                   | -                       | -              | 37.6 (10.9)                 | 6.69 (3.03)                         | 138 (78)       | -                     |                      |      |
| 120 (3/8)                          | 40.8 (6.2)                  | 12.5 (8.3)                          | 3.2 (0.4)               | 80.2 (38.9)    | 32.0 (12.6)                 | 8.23 (2.23)                         | 96.3 (29.9)    | 0.85                  | 1.03                 | 1.11 |
| All (45/54)                        | 32.2 (9.7)                  | 7.88 (2.92)                         | 3.3 (0.9)               | 104 (35)       | 31.5 (10.3)                 | 7.32 (2.37)                         | 111 (52)       | 0.94                  | 0.88                 | 1.10 |

Concentrations expressed as carboplatin mass units. N/N, in the absence and presence of veliparib.

AUC<sub>0-inf</sub> (carboplatin without veliparib, day 1 if a carboplatin paclitaxel alone lead-in cycle was given) extrapolated beyond the last time point sampled was mean 1.9% (range 0-31%).



AUC<sub>0-inf</sub> (carboplatin with veliparib, day 3 of cycle 1 or 2) extrapolated beyond the last time point sampled was mean 3.9% (range 0-36%).

Ratios reported as median; mean overall ratio C<sub>max</sub> 0.98 (0.32), AUC<sub>0-inf</sub> 0.95 (0.25), CL 1.11 (0.32), all non-significant by 2-sided exact Wilcoxon signed rank test.

**Supplemental Table 5. Mean (standard deviation) pharmacokinetic parameters of paclitaxel in the absence and presence of veliparib.**

|                                                      | Veliparib -                 |                                   |                         |                             | Veliparib +                 |                                   | Ratio+/-<br>veliparib |                      |
|------------------------------------------------------|-----------------------------|-----------------------------------|-------------------------|-----------------------------|-----------------------------|-----------------------------------|-----------------------|----------------------|
| Dose (N/N)<br>Vel (mg)/<br>Pac. (mg/m <sup>2</sup> ) | C <sub>max</sub><br>(µg/mL) | AUC <sub>0-inf</sub><br>(µg•h/mL) | T <sub>1/2</sub><br>(h) | CL<br>(L/h/m <sup>2</sup> ) | C <sub>max</sub><br>(µg/mL) | AUC <sub>0-inf</sub><br>(µg•h/mL) | C <sub>max</sub>      | AUC <sub>0-inf</sub> |
| 10/150 (1/1)                                         | 1.85                        | 7.30                              | 5.8                     | 20.6                        | 2.06                        | 7.70                              | 1.11                  | 1.05                 |
| 20/150 (8/7)                                         | 9.31 (3.19)                 | 35.8 (10.4)                       | 6.3 (1.1)               | 4.67 (1.98)                 | 8.01 (3.93)                 | 28.8 (13.9)                       | 0.80                  | 0.82                 |
| 20/175 (3/3)                                         | 5.21 (1.64)                 | 18.2 (4.7)                        | 5.9 (0.2)               | 10.1 (2.8)                  | 4.94 (2.39)                 | 19.7 (11.4)                       | 0.82                  | 0.84                 |
| 40/175 (3/3)                                         | 3.30 (0.77)                 | 14.7 (2.6)                        | 6.2 (1.1)               | 12.2 (2.1)                  | 4.30 (1.10)                 | 16.1 (2.7)                        | 1.20                  | 1.06                 |
| 40/200 (16/12)                                       | 5.64 (1.48)                 | 21.9 (5.6)                        | 6.3 (1.8)               | 9.65 (2.22)                 | 4.76 (1.56)                 | 21.5 (6.2)                        | 0.89                  | 1.07                 |
| 50/200 (5/5)                                         | 5.63 (1.02)                 | 19.8 (3.2)                        | 5.1 (1.6)               | 10.3 (1.6)                  | 5.75 (0.64)                 | 19.8 (2.7)                        | 1.09                  | 1.03                 |
| 80/200 (6/10)                                        | 4.62 (1.25)                 | 19.8 (6.8)                        | 6.5 (1.4)               | 11.4 (4.7)                  | 6.06 (2.61)                 | 24.9 (12.9)                       | 1.17                  | 1.34                 |
| 100/200 (0/6)                                        | -                           | -                                 | -                       | -                           | 7.38 (3.18)                 | 39.9 (16.1)                       | -                     | -                    |
| 120/200 (3/10)                                       | 8.26 (0.53)                 | 25.9 (1.11)                       | 4.2 (2.8)               | 7.73 (0.33)                 | 6.69 (1.08)                 | 24.3 (4.6)                        | 0.87                  | 0.95                 |
| All (44/55)                                          | 6.06 (2.53)                 | 23.1 (9.0)                        | 6.0 (1.6)               | 9.37 (3.76)                 | 6.01 (2.49)                 | 24.8 (11.4)                       | 1.00                  | 1.04                 |

N/N, in the absence and presence of veliparib.

AUC<sub>0-inf</sub> (paclitaxel without veliparib, day 1 if a carboplatin paclitaxel alone lead-in cycle was given) extrapolated beyond the last time point sampled was mean 4.2% (range 1-19%).

AUC<sub>0-inf</sub> (paclitaxel with veliparib, day 3 of cycle 1 or 2) extrapolated beyond the last time point sampled was mean 6.4% (range 1-27%).

Ratios reported as median; mean overall ratio C<sub>max</sub> 1.01 (0.31), AUC<sub>0-inf</sub> 1.03 (0.24), all non-significant by 2-sided exact Wilcoxon signed rank test.



**Supplemental Figure 1b. Day 15 Neutrophils: Cycle 1 vs Cycle 2**

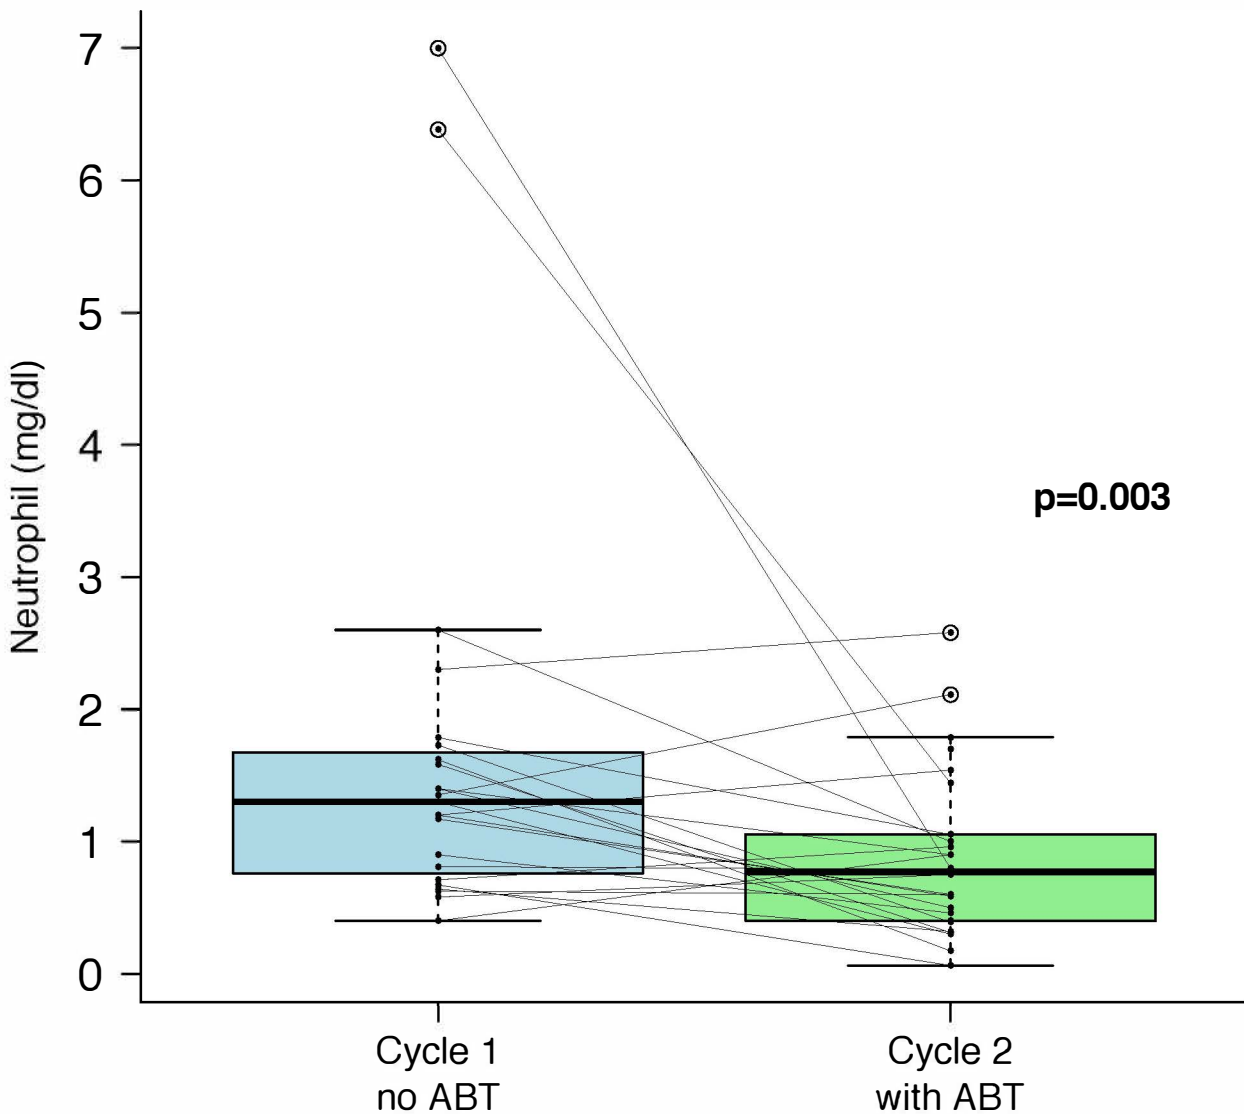

**Supplemental Figure 1c.** Maximum Relative Change of Neutrophil from Baseline Cycle 1 vs Cycle 2

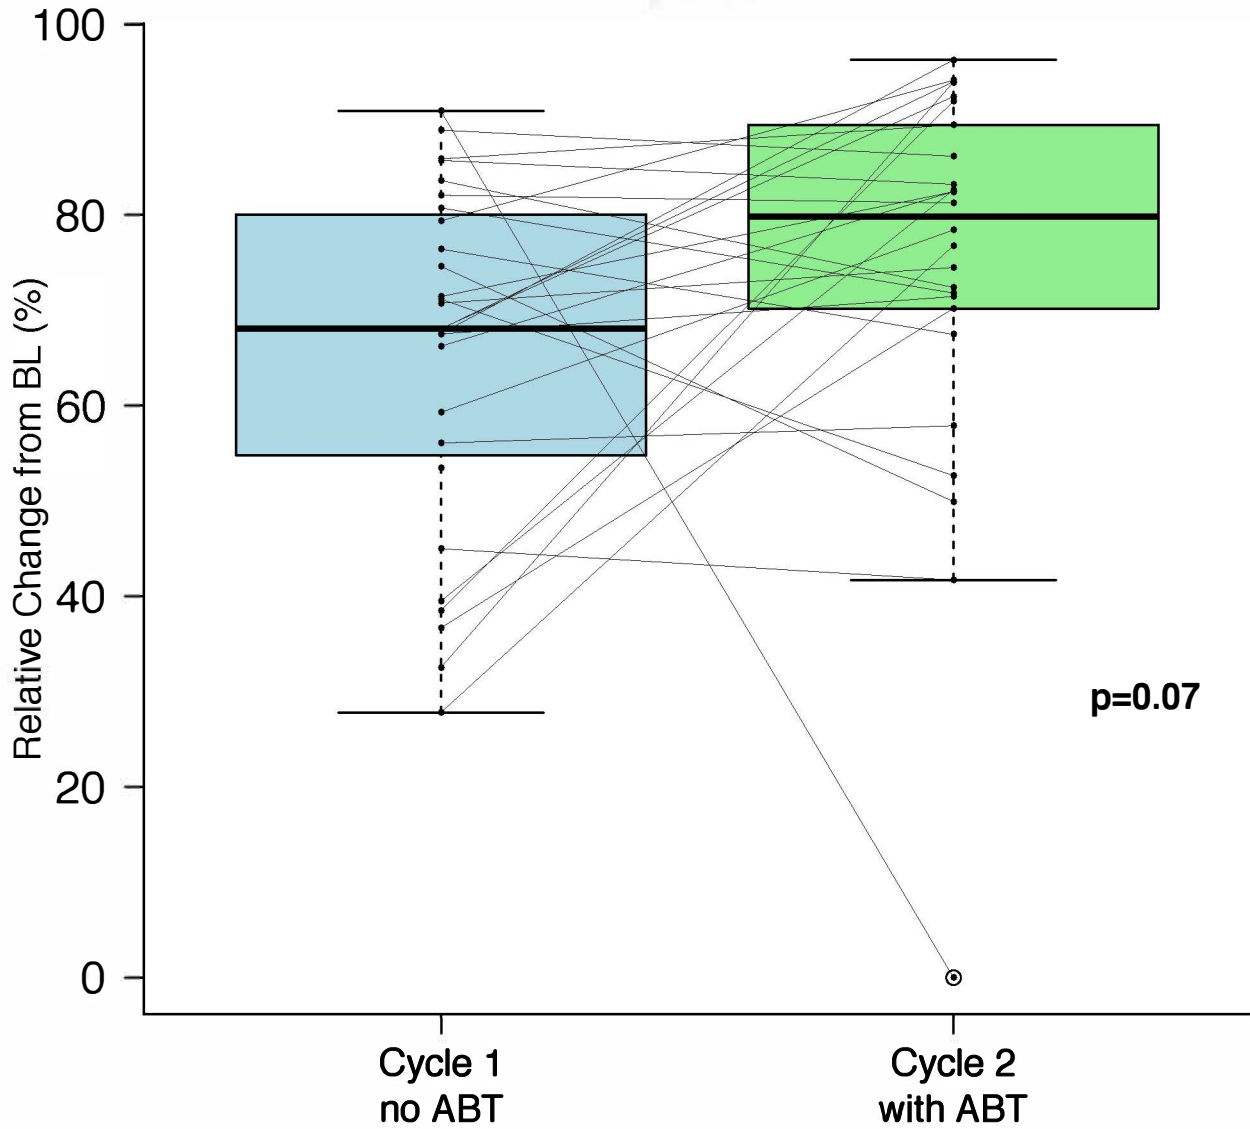

**Supplementary Figure 1.** Plot of neutrophil in cycle 1 (no veliparib) vs cycle 2 (with veliparib). D8 and D15 ANC was plotted and compared for cycle 1 vs cycle 2 for 27 patients who received carboplatin and paclitaxel only in cycle 1 and were evaluable for DLT in cycle 2 after receiving carboplatin, paclitaxel and veliparib (A, B). We also plotted and compared the maximum relative change of neutrophil from baseline of cycle 1 vs cycle 2 (C), which is the difference between the minimum value of D8, D15, and D22 and the baseline value. Two-sided Wilcoxon signed rank test was performed to compare cycle 1 vs cycle 2. In Part A, Day 8 ANC was lower in cycle 1 compared to cycle 2. However, in Part B, day 15 ANC was higher in cycle 1 compared to cycle 2. In Part 3, maximum relative change of neutrophil count from baseline in cycle 1 was smaller compared to cycle 2.
